# Supplementary material for: Choroidal Thickness in Early Postnatal Guinea Pigs Predicts Subsequent Naturally Occurring and Form-Deprivation Myopia
Source: PubMed Central journal article supplement — Invest Ophthalmol Vis Sci. 2022 Oct 14;63(11):10. doi: 10.1167/iovs.63.11.10 (PMC9586133; doi:10.1167/iovs.63.11.10), 2022-10-14
Supplement: iovs-63-11-10_s001.pdf [file iovs-63-11-10_s001.pdf]

Table S1. Result of Ingenuity Pathway Analysis (IPA). Total of 157 ingenuity canonical pathways were identified from IPA database.

| #  | Ingenuity Canonical Pathways                         | -log(p-value) |
|----|------------------------------------------------------|---------------|
| 1  | Mitochondrial Dysfunction                            | 13.6          |
| 2  | Oxidative Phosphorylation                            | 12.3          |
| 3  | Sirtuin Signaling Pathway                            | 12.2          |
| 4  | Regulation of eIF4 and p70S6K Signaling              | 6.86          |
| 5  | mTOR Signaling                                       | 5.73          |
| 6  | Aspartate Degradation II                             | 5.25          |
| 7  | Mechanisms of Viral Exit from Host Cells             | 5.16          |
| 8  | Neuregulin Signaling                                 | 5.11          |
| 9  | Huntington's Disease Signaling                       | 4.97          |
| 10 | Virus Entry via Endocytic Pathways                   | 4.93          |
| 11 | TCA Cycle II (Eukaryotic)                            | 4.77          |
| 12 | Gluconeogenesis I                                    | 4.44          |
| 13 | Estrogen Receptor Signaling                          | 4.37          |
| 14 | Sertoli Cell-Sertoli Cell Junction Signaling         | 4.16          |
| 15 | Regulation of Cellular Mechanics by Calpain Protease | 4.10          |
| 16 | Caveolar-mediated Endocytosis Signaling              | 3.97          |
| 17 | Semaphorin Neuronal Repulsive Signaling Pathway      | 3.93          |
| 18 | Protein Kinase A Signaling                           | 3.93          |
| 19 | HGF Signaling                                        | 3.90          |
| 20 | Glycogen Degradation II                              | 3.78          |
| 21 | Necroptosis Signaling Pathway                        | 3.76          |
| 22 | HER-2 Signaling in Breast Cancer                     | 3.67          |
| 23 | Fatty Acid $\beta$ -oxidation I                      | 3.60          |
| 24 | Tumoricidal Function of Hepatic Natural Killer Cells | 3.55          |
| 25 | Apoptosis Signaling                                  | 3.54          |
| 26 | Glycine Cleavage Complex                             | 3.53          |
| 27 | Glycogen Degradation III                             | 3.49          |
| 28 | $\alpha$ -Adrenergic Signaling                       | 3.41          |
| 29 | Clathrin-mediated Endocytosis Signaling              | 3.41          |
| 30 | Signaling by Rho Family GTPases                      | 3.33          |

|    |                                                 |      |
|----|-------------------------------------------------|------|
| 31 | AMPK Signaling                                  | 3.32 |
| 32 | L-dopachrome Biosynthesis                       | 3.20 |
| 33 | Role of Tissue Factor in Cancer                 | 3.16 |
| 34 | NF- $\kappa$ B Activation by Viruses            | 3.12 |
| 35 | Isoleucine Degradation I                        | 3.04 |
| 36 | Integrin Signaling                              | 2.99 |
| 37 | RHO GDI Signaling                               | 2.95 |
| 38 | Dilated Cardiomyopathy Signaling Pathway        | 2.88 |
| 39 | PTEN Signaling                                  | 2.84 |
| 40 | Insulin Secretion Signaling Pathway             | 2.82 |
| 41 | PI3K/AKT Signaling                              | 2.79 |
| 42 | Paxillin Signaling                              | 2.79 |
| 43 | EIF2 Signaling                                  | 2.78 |
| 44 | Pyrimidine Ribonucleotides Interconversion      | 2.77 |
| 45 | Glucocorticoid Receptor Signaling               | 2.76 |
| 46 | Methylglyoxal Degradation I                     | 2.73 |
| 47 | Glutamate Degradation II                        | 2.73 |
| 48 | Aspartate Biosynthesis                          | 2.73 |
| 49 | Unfolded protein response                       | 2.72 |
| 50 | Coronavirus Pathogenesis Pathway                | 2.71 |
| 51 | The Visual Cycle                                | 2.70 |
| 52 | RAR Activation                                  | 2.69 |
| 53 | Pyrimidine Ribonucleotides De Novo Biosynthesis | 2.66 |
| 54 | Noradrenaline and Adrenaline Degradation        | 2.66 |
| 55 | Sucrose Degradation V (Mammalian)               | 2.65 |
| 56 | Molecular Mechanisms of Cancer                  | 2.65 |
| 57 | Actin Nucleation by ARP-WASP Complex            | 2.63 |
| 58 | HIF1 $\alpha$ Signaling                         | 2.62 |
| 59 | Acute Phase Response Signaling                  | 2.59 |
| 60 | Regulation of Actin-based Motility by Rho       | 2.58 |
| 61 | Ethanol Degradation IV                          | 2.55 |
| 62 | Synaptogenesis Signaling Pathway                | 2.54 |
| 63 | Aldosterone Signaling in Epithelial Cells       | 2.53 |
| 64 | Macropinocytosis Signaling                      | 2.53 |

|    |                                                                 |             |
|----|-----------------------------------------------------------------|-------------|
| 65 | <b>Nitric Oxide Signaling in the Cardiovascular System</b>      | <b>2.51</b> |
| 66 | Melanocyte Development and Pigmentation Signaling               | 2.49        |
| 67 | 2-ketoglutarate Dehydrogenase Complex                           | 2.44        |
| 68 | Eumelanin Biosynthesis                                          | 2.44        |
| 69 | L-cysteine Degradation I                                        | 2.44        |
| 70 | Actin Cytoskeleton Signaling                                    | 2.43        |
| 71 | UDP-N-acetyl-D-galactosamine Biosynthesis II                    | 2.43        |
| 72 | Glioma Signaling                                                | 2.39        |
| 73 | Role of NFAT in Cardiac Hypertrophy                             | 2.38        |
| 74 | Protein Ubiquitination Pathway                                  | 2.37        |
| 75 | Glycolysis I                                                    | 2.36        |
| 76 | Phenylalanine Degradation IV (Mammalian, via Side Chain)        | 2.33        |
| 77 | GP6 Signaling Pathway                                           | 2.32        |
| 78 | ILK Signaling                                                   | 2.32        |
| 79 | Type II Diabetes Mellitus Signaling                             | 2.27        |
| 80 | G Beta Gamma Signaling                                          | 2.27        |
| 81 | Ephrin Receptor Signaling                                       | 2.27        |
| 82 | CLEAR Signaling Pathway                                         | 2.23        |
| 83 | Creatine-phosphate Biosynthesis                                 | 2.22        |
| 84 | Lysine Degradation II                                           | 2.22        |
| 85 | Galactose Degradation I (Leloir Pathway)                        | 2.22        |
| 86 | Aryl Hydrocarbon Receptor Signaling                             | 2.16        |
| 87 | <b>eNOS Signaling</b>                                           | <b>2.16</b> |
| 88 | Granzyme B Signaling                                            | 2.16        |
| 89 | D-myo-inositol (1,4,5)-trisphosphate Degradation                | 2.16        |
| 90 | Phagosome Maturation                                            | 2.16        |
| 91 | IL-8 Signaling                                                  | 2.15        |
| 92 | SNARE Signaling Pathway                                         | 2.13        |
| 93 | Dopamine Degradation                                            | 2.09        |
| 94 | UDP-N-acetyl-D-glucosamine Biosynthesis II                      | 2.05        |
| 95 | Amyloid Processing                                              | 2.05        |
| 96 | Melatonin Signaling                                             | 2.03        |
| 97 | Apelin Endothelial Signaling Pathway                            | 2.03        |
| 98 | Fcy Receptor-mediated Phagocytosis in Macrophages and Monocytes | 2.02        |

|     |                                                                 |      |
|-----|-----------------------------------------------------------------|------|
| 99  | Fc Epsilon RI Signaling                                         | 2.01 |
| 100 | PAK Signaling                                                   | 2.01 |
| 101 | Leukocyte Extravasation Signaling                               | 2.01 |
| 102 | Ethanol Degradation II                                          | 2.00 |
| 103 | CXCR4 Signaling                                                 | 1.98 |
| 104 | Androgen Signaling                                              | 1.98 |
| 105 | Cardiac Hypertrophy Signaling (Enhanced)                        | 1.98 |
| 106 | Phototransduction Pathway                                       | 1.95 |
| 107 | Opioid Signaling Pathway                                        | 1.94 |
| 108 | Thrombin Signaling                                              | 1.93 |
| 109 | Acetyl-CoA Biosynthesis I (Pyruvate Dehydrogenase Complex)      | 1.92 |
| 110 | NAD Signaling Pathway                                           | 1.85 |
| 111 | IL-3 Signaling                                                  | 1.84 |
| 112 | Cardiac $\beta$ -adrenergic Signaling                           | 1.83 |
| 113 | Tight Junction Signaling                                        | 1.83 |
| 114 | Glutaryl-CoA Degradation                                        | 1.83 |
| 115 | Valine Degradation I                                            | 1.83 |
| 116 | Histamine Degradation                                           | 1.83 |
| 117 | Fatty Acid $\alpha$ -oxidation                                  | 1.83 |
| 118 | Renal Cell Carcinoma Signaling                                  | 1.82 |
| 119 | Superoxide Radicals Degradation                                 | 1.80 |
| 120 | Osteoarthritis Pathway                                          | 1.78 |
| 121 | Superpathway of D-myo-inositol (1,4,5)-trisphosphate Metabolism | 1.77 |
| 122 | Putrescine Degradation III                                      | 1.77 |
| 123 | Telomerase Signaling                                            | 1.74 |
| 124 | p70S6K Signaling                                                | 1.74 |
| 125 | Axonal Guidance Signaling                                       | 1.74 |
| 126 | P2Y Purigenic Receptor Signaling Pathway                        | 1.72 |
| 127 | ERK/MAPK Signaling                                              | 1.68 |
| 128 | Thrombopoietin Signaling                                        | 1.68 |
| 129 | Xenobiotic Metabolism AHR Signaling Pathway                     | 1.65 |
| 130 | Induction of Apoptosis by HIV1                                  | 1.63 |
| 131 | RAC Signaling                                                   | 1.63 |
| 132 | Prostanoid Biosynthesis                                         | 1.61 |

|            |                                                         |             |
|------------|---------------------------------------------------------|-------------|
| 133        | Insulin Receptor Signaling                              | 1.60        |
| 134        | Pyridoxal 5'-phosphate Salvage Pathway                  | 1.60        |
| 135        | Glutamine Biosynthesis I                                | 1.60        |
| 136        | PPAR $\alpha$ /RXR $\alpha$ Activation                  | 1.59        |
| 137        | Oxytocin Signaling Pathway                              | 1.59        |
| 138        | Amyotrophic Lateral Sclerosis Signaling                 | 1.59        |
| 139        | GPCR-Mediated Nutrient Sensing in Enteroendocrine Cells | 1.53        |
| 140        | NAD Salvage Pathway II                                  | 1.53        |
| 141        | Tryptophan Degradation X (Mammalian, via Tryptamine)    | 1.53        |
| 142        | Purine Nucleotides De Novo Biosynthesis II              | 1.53        |
| 143        | GDP-glucose Biosynthesis                                | 1.53        |
| <b>144</b> | <b>nNOS Signaling in Neurons</b>                        | <b>1.52</b> |
| 145        | WNT/ $\beta$ -catenin Signaling                         | 1.51        |
| 146        | Apelin Muscle Signaling Pathway                         | 1.49        |
| 147        | Tryptophan Degradation III (Eukaryotic)                 | 1.49        |
| 148        | Renin-Angiotensin Signaling                             | 1.46        |
| 149        | Cleavage and Polyadenylation of Pre-mRNA                | 1.45        |
| 150        | Glucose and Glucose-1-phosphate Degradation             | 1.45        |
| 151        | Hepatic Fibrosis Signaling Pathway                      | 1.42        |
| 152        | Apelin Cardiomyocyte Signaling Pathway                  | 1.41        |
| 153        | VEGF Signaling                                          | 1.41        |
| 154        | UVC-Induced MAPK Signaling                              | 1.41        |
| 155        | NAD Phosphorylation and Dephosphorylation               | 1.39        |
| 156        | Dopamine-DARPP32 Feedback in cAMP Signaling             | 1.38        |
| 157        | Relaxin Signaling                                       | 1.38        |
